# Supplementary material
Source: publisher figshare collection journal article supplement (https://f1000.figshare.com/articles/dataset/_/106726)
Supplement: Supplementary file 1 [file 1]

| Table format:<br>Grouped |       | Group A |      |      |      | Group B |      |      |      |
|--------------------------|-------|---------|------|------|------|---------|------|------|------|
|                          |       | P       |      |      |      | P+B     |      |      |      |
|                          |       | A:Y1    | A:Y2 | A:Y3 | A:Y4 | B:Y1    | B:Y2 | B:Y3 | B:Y4 |
| 1                        | Day 3 | 2.3     | 3.0  | 1.9  | 3.8  | 22.1    | 26.4 | 19.9 | 30.7 |
| 2                        | Day 4 | 2.1     | 1.2  | 1.7  | 0.3  | 37.7    | 35.0 | 34.1 | 38.0 |
| 3                        | Day 5 | 1.9     | 2.9  | 1.5  | 3.6  | 28.3    | 28.9 | 25.5 | 33.5 |
| 4                        | Day 6 | 3.4     | 2.5  | 2.9  | 3.2  | 23.9    | 25.1 | 21.5 | 29.2 |

|   | Group C |      |      |      | Group D |      |      |      |      |
|---|---------|------|------|------|---------|------|------|------|------|
|   | XY24TL  |      |      |      | XY27FD  |      |      |      |      |
|   | C:Y1    | C:Y2 | C:Y3 | C:Y4 | D:Y1    | D:Y2 | D:Y3 | D:Y4 | E:Y1 |
| 1 | 5.7     | 7.8  | 5.0  | 9.3  | 17.2    | 13.5 | 15.4 | 15.8 | 20.0 |
| 2 | 36.2    | 29.6 | 32.7 | 34.3 | 41.6    | 32.4 | 37.6 | 37.6 | 34.5 |
| 3 | 31.8    | 32.3 | 28.7 | 37.4 | 32.4    | 31.1 | 29.3 | 36.1 | 30.0 |
| 4 | 27.2    | 26.5 | 24.5 | 30.8 | 26.7    | 27.6 | 24.1 | 32.0 | 23.7 |

|   | Group E |      |      | Group F     |      |      |      |
|---|---------|------|------|-------------|------|------|------|
|   | HIDEM 1 |      |      | LGMD2D Pt.3 |      |      |      |
|   | E:Y2    | E:Y3 | E:Y4 | F:Y1        | F:Y2 | F:Y3 | F:Y4 |
| 1 | 17.5    | 18.0 | 20.4 | 15.2        | 15.9 | 13.6 | 18.6 |
| 2 | 40.5    | 31.2 | 46.9 | 38.9        | 39.9 | 35.2 | 46.2 |
| 3 | 30.6    | 27.1 | 35.5 | 31.5        | 27.6 | 28.4 | 32.0 |
| 4 | 25.3    | 21.3 | 29.4 | 21.0        | 28.6 | 18.9 | 33.2 |
