# Supplementary material
Source: publisher figshare collection journal article supplement (https://f1000.figshare.com/articles/dataset/_/106726)
Supplement: Supplementary file 3 [file 1]

| Table format:<br>Grouped |       | Group A |      |      |      | Group B |      |      |      |
|--------------------------|-------|---------|------|------|------|---------|------|------|------|
|                          |       | P       |      |      |      | P+B     |      |      |      |
|                          |       | A:Y1    | A:Y2 | A:Y3 | A:Y4 | B:Y1    | B:Y2 | B:Y3 | B:Y4 |
| 1                        | Day 3 | 3.1     | 5.2  | 2.6  | 6.3  | 14.0    | 18.0 | 12.5 | 21.0 |
| 2                        | Day 4 | 5.3     | 6.0  | 4.6  | 7.2  | 67.0    | 60.1 | 60.7 | 69.4 |
| 3                        | Day 5 | 4.4     | 3.9  | 3.8  | 4.8  | 59.0    | 53.2 | 53.4 | 61.5 |
| 4                        | Day 6 | 3.9     | 4.4  | 3.3  | 5.4  | 50.0    | 52.1 | 45.3 | 60.2 |

|   | Group C |      |      |      | Group D |      |      |      |      |
|---|---------|------|------|------|---------|------|------|------|------|
|   | XY24TL  |      |      |      | XY27FD  |      |      |      |      |
|   | C:Y1    | C:Y2 | C:Y3 | C:Y4 | D:Y1    | D:Y2 | D:Y3 | D:Y4 | E:Y1 |
| 1 | 6.0     | 8.1  | 5.3  | 9.6  | 12.0    | 13.0 | 10.7 | 15.3 | 13.0 |
| 2 | 69.0    | 76.0 | 62.5 | 87.7 | 65.0    | 70.0 | 58.9 | 80.8 | 67.0 |
| 3 | 59.0    | 67.0 | 53.4 | 77.4 | 55.0    | 69.4 | 49.8 | 80.1 | 60.0 |
| 4 | 52.0    | 58.0 | 47.1 | 67.0 | 62.1    | 50.0 | 56.3 | 57.8 | 65.0 |

|   | Group E |      |      | Group F     |      |      |      |
|---|---------|------|------|-------------|------|------|------|
|   | HIDEM 1 |      |      | LGMD2D Pt.3 |      |      |      |
|   | E:Y2    | E:Y3 | E:Y4 | F:Y1        | F:Y2 | F:Y3 | F:Y4 |
| 1 | 10.0    | 11.6 | 11.8 | 9.0         | 11.9 | 8.0  | 14.0 |
| 2 | 72.0    | 60.7 | 83.1 | 66.0        | 75.0 | 59.8 | 86.6 |
| 3 | 58.0    | 54.3 | 67.0 | 60.8        | 62.6 | 55.1 | 72.3 |
| 4 | 51.0    | 58.9 | 59.0 | 56.0        | 63.0 | 50.7 | 72.8 |
